# Supplementary material for: One-pot synthesis of an Au/Au2S viologen hybrid nanocomposite for efficient catalytic applications
Source: Royal Society of Chemistry journal article supplement (doi:10.1039/c5ta01372k), 2015-01-01

## Electronic Supplementary Information (ESI)

**Figure S1.** Successive UV-Vis spectra of the reduction of 4-NP by **a)** Au/Au<sub>2</sub>S nanoparticles and **b)** Viologen; in presence of excess NaBH<sub>4</sub>. **c)** Comparative UV-Vis spectra of 4-NP reduction after 600 s for Au/Au<sub>2</sub>S nanoparticles, Viologen and Au/Au<sub>2</sub>S-V nanocomposite.

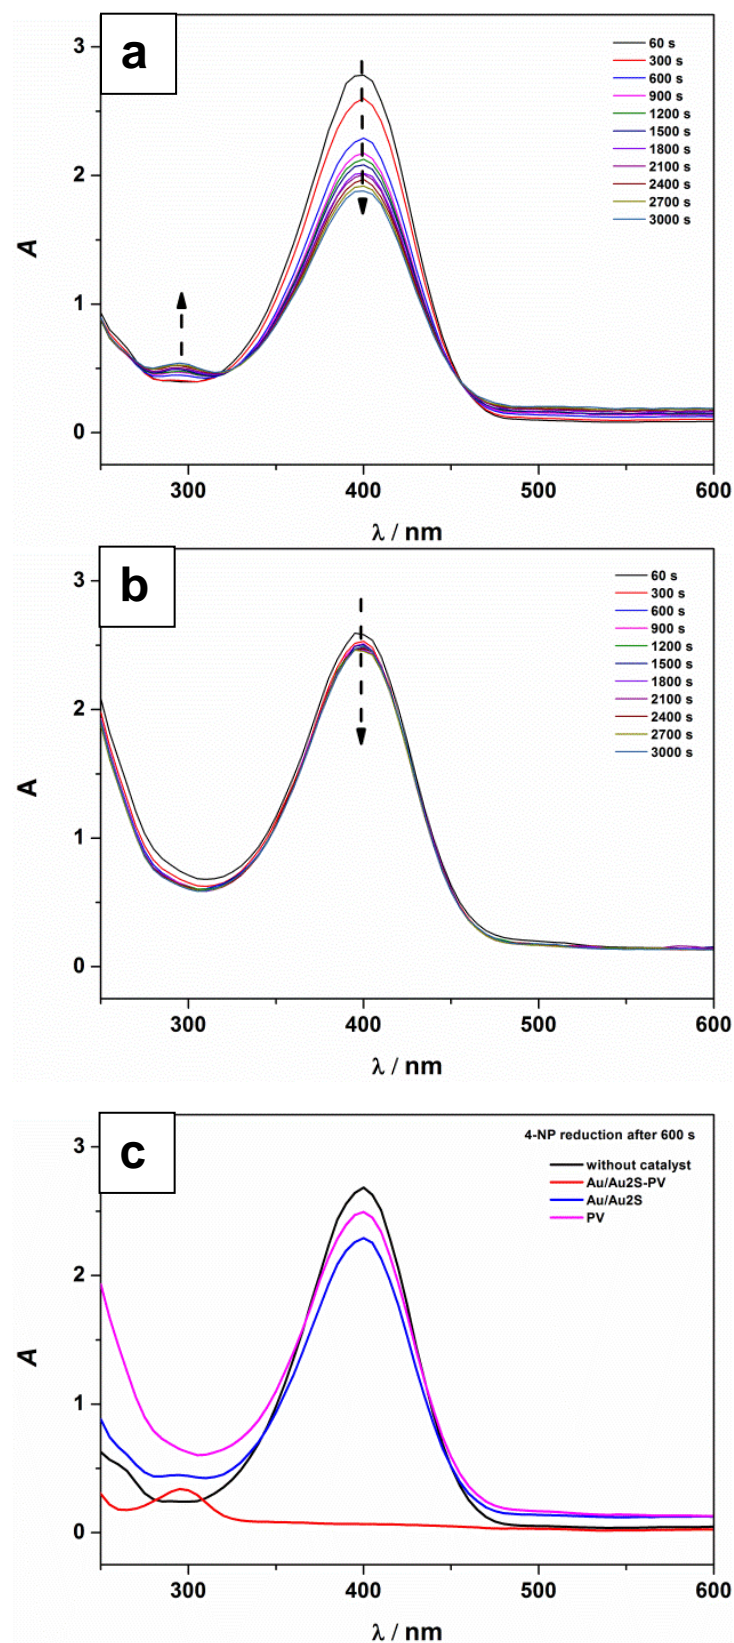

**Fig. S2.** UV-Vis spectra of pure Au/Au<sub>2</sub>S-V nanocomposite in aqueous solution.

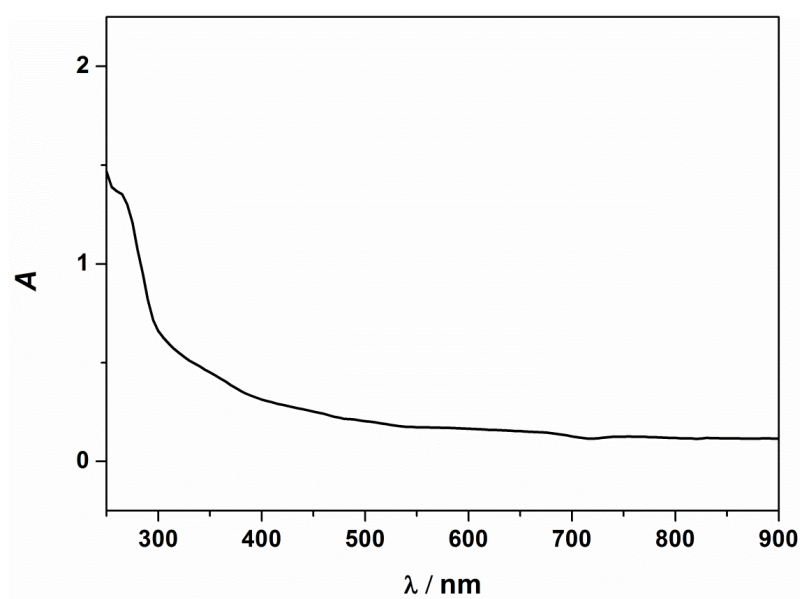

Supplement: c5ta01372k1.pdf [file c5ta01372k1.pdf]
